## 1 Title page

2 **Title:** Development of interoperable, domain-specific extensions for the German Corona  
3 Consensus (GECCO) COVID-19 research dataset using an interdisciplinary, consensus-based  
4 workflow

5 **Authors:** Gregor Lichtner<sup>1,2,3</sup>, Thomas Haese<sup>1</sup>, Sally Brose<sup>4</sup>, Larissa Röhrig<sup>1,5</sup>, Liudmila Lysyakova<sup>6,7</sup>, Stefanie  
6 Rudolph<sup>6,7</sup>, Maria Uebe<sup>6,7</sup>, Julian Sass<sup>1</sup>, Alexander Bartschke<sup>1</sup>, David Hillus<sup>8</sup>, Florian Kurth<sup>8,9</sup>, Leif Erik  
7 Sander<sup>8</sup>, Falk Eckart<sup>10</sup>, Nicole Toepfner<sup>10</sup>, Reinhard Berner<sup>10</sup>, Anna Frey<sup>11</sup>, Marcus Dörr<sup>12</sup>, Jörg Janne  
8 Vehreschild<sup>13,14,15</sup>, Christof von Kalle<sup>6,7</sup>, Sylvia Thun<sup>1</sup>

9 <sup>1</sup> Berlin Institute of Health at Charité – Universitätsmedizin Berlin, Berlin, Germany

10 <sup>2</sup> Charité – Universitätsmedizin Berlin, Corporate Member of Freie Universität Berlin and  
11 Humboldt-Universität zu Berlin, Institute of Medical Informatics, Berlin, Germany

12 <sup>3</sup> Universitätsmedizin Greifswald, Department of Anesthesia, Critical Care, Emergency and Pain  
13 Medicine, Greifswald, Germany

14 <sup>4</sup> Robert Koch Institute, Department of Methodology and Research Infrastructure, Research Data  
15 Management, Berlin, Germany

16 <sup>5</sup> National Association of Statutory Health Insurance Physicians ("Kassenärztliche  
17 Bundesvereinigung"; KBV), Digitalization and IT, Department Interoperability, Berlin, Germany

18 <sup>6</sup> Charité - Universitätsmedizin Berlin, Corporate Member of Freie Universität Berlin and  
19 Humboldt-Universität zu Berlin, joint Charité and BIH Clinical Study Center, Berlin, Germany

20 <sup>7</sup> Berlin Institute of Health at Charité – Universitätsmedizin Berlin, joint Charité and BIH Clinical  
21 Study Center, Berlin, Germany

22 <sup>8</sup> Charité – Universitätsmedizin Berlin, Corporate Member of Freie Universität Berlin and  
23 Humboldt-Universität zu Berlin, Department of Infectious Diseases and Respiratory Medicine,  
24 Berlin, Germany

25 <sup>9</sup> University Medical Centre Hamburg-Eppendorf, Department of Tropical Medicine, Bernhard  
26 Nocht Institute for Tropical Medicine and Department of Medicine I, Hamburg, Germany

27 <sup>10</sup> Department of Pediatrics, University Hospital Carl Gustav Carus, Technische Universität  
28 Dresden, Dresden, Germany

29 <sup>11</sup> University Hospital of Würzburg, Medical Clinic and Policlinic I, Würzburg, Germany

30 <sup>12</sup> Universitätsmedizin Greifswald, Department of Internal Medicine B, Greifswald, Germany

31 <sup>13</sup> Department I of Internal Medicine, University Hospital of Cologne, Cologne, Germany

32 <sup>14</sup> German Centre for Infection Research (DZIF), Partner Site Bonn-Cologne, Cologne, Germany

33 **NOTE:** This preprint reports new research that has not been certified by peer review and should not be used to guide clinical practice.

34 <sup>15</sup> Department II of Internal Medicine, Hematology/Oncology, Goethe University, Frankfurt,  
Frankfurt am Main, Germany

## 35 Abstract

### 36 Background

37 The COVID-19 pandemic has spurred large-scale, inter-institutional research efforts. To enable these  
38 efforts, researchers must agree on dataset definitions that not only cover all elements relevant to the  
39 respective medical specialty but that are also syntactically and semantically interoperable. Following  
40 such an effort, the German Corona Consensus (GECCO) dataset has been developed previously as a  
41 harmonized, interoperable collection of the most relevant data elements for COVID-19-related patient  
42 research. As GECCO has been developed as a compact core dataset across all medical fields, the  
43 focused research within particular medical domains demands the definition of extension modules that  
44 include those data elements that are most relevant to the research performed in these individual  
45 medical specialties.

### 46 Objective

47 To (i) specify a workflow for the development of interoperable dataset definitions that involves a close  
48 collaboration between medical experts and information scientists and to (ii) apply the workflow to  
49 develop dataset definitions that include data elements most relevant to COVID-19-related patient  
50 research in *immunization*, *pediatrics*, and *cardiology*.

### 51 Methods

52 We developed a workflow to create dataset definitions that are (i) content-wise as relevant as possible  
53 to a specific field of study and (ii) universally usable across computer systems, institutions, and  
54 countries, i.e., interoperable. We then gathered medical experts from three specialties (*immunization*,  
55 *pediatrics*, and *cardiology*) to select data elements most relevant to COVID-19-related patient  
56 research in the respective specialty. We mapped the data elements to international standardized  
57 vocabularies and created data exchange specifications using HL7 FHIR. All steps were performed in  
58 close interdisciplinary collaboration between medical domain experts and medical information  
59 scientists. The profiles and vocabulary mappings were syntactically and semantically validated in a two-  
60 stage process.

### 61 Results

62 We created GECCO extension modules for the *immunization*, *pediatrics*, and *cardiology* domains with  
63 respect to the pandemic requests. The data elements included in each of these modules were selected  
64 according to the here developed consensus-based workflow by medical experts from the respective  
65 specialty to ensure that the contents are aligned with the respective research needs. We defined  
66 dataset specifications for a total number of 48 (*immunization*), 150 (*pediatrics*), and 52 (*cardiology*)

67 data elements that complement the GECCO core dataset. We created and published implementation  
68 guides and example implementations as well as dataset annotations for each extension module.

## 69 [Conclusions](#)

70 These here presented GECCO extension modules, which contain data elements most relevant to  
71 COVID-19-related patient research in *immunization*, *pediatrics* and *cardiology*, were defined in an  
72 interdisciplinary, iterative, consensus-based workflow that may serve as a blueprint for the  
73 development of further dataset definitions. The GECCO extension modules provide a standardized and  
74 harmonized definition of specialty-related datasets that can help to enable inter-institutional and  
75 cross-country COVID-19 research in these specialties.

76

## 77 Keywords

78 - COVID-19

79 - Interoperability

80 - GECCO dataset

81 - FHIR

82 - Research dataset

83 - FAIR principles

84

## 85 Introduction

86 The COVID-19 pandemic has led to unprecedented strong efforts in connecting nationwide and  
87 international research to help in managing the disease and its effects on public health. To enable  
88 research across different health care providers, institutions or even countries, interoperability  
89 between the medical data systems is essential [1]. Therefore, early in the pandemic, the German  
90 Corona Consensus Dataset (GECCO) has been developed in a collaborative effort to provide a  
91 standardized, unified core dataset for inter-institutional COVID-19-related patient research [2]. The  
92 GECCO dataset specifies a set of 81 essential clinical data elements from 13 domains such as anamnesis  
93 & risk factors, symptoms, and vital signs, that have been selected by expert committees from university  
94 hospitals, professional associations, and research initiatives. Since its development, the GECCO dataset  
95 has been implemented in a large number of institutions, most notably in virtually every German  
96 university hospital, which now provides access to the GECCO dataset in the context of the German  
97 COVID-19 Research Network of University Medicine (“Netzwerk Universitätsmedizin”) [3,4].

98 The GECCO dataset has been developed to contain as many relevant data elements as possible, but  
99 few enough to keep the effort of implementing the dataset manageable. Therefore, the dataset  
100 contains mostly data elements of general research interest, excluding data elements that are only of  
101 interest for particular medical specialties or use cases. These data items are considered part of domain-  
102 specific extension modules to the GECCO dataset, which are introduced in this article.

103 Thus, we here aimed to develop domain-specific extensions to the GECCO dataset that cover the most  
104 relevant data elements for COVID-19-related patient research for the medical specialties of  
105 *immunization, pediatrics, and cardiology*. To that end, we first developed a workflow that aims at  
106 providing dataset definitions that (i) contain the most relevant data elements for the research aims of  
107 the end users and (ii) that can be applied universally across institutions and countries. We then  
108 followed that workflow with different groups of medical experts from different medical specialties to  
109 define extension modules relevant for *immunization, pediatrics, and cardiology*.

110 These extension modules complement the GECCO core dataset and use the same international health  
111 IT standards and terminologies as the GECCO dataset, such as the *Systematized Nomenclature of*  
112 *Medicine - Clinical Terms* (SNOMED CT)[5] and *Logical Observation Identifiers Names and Codes*  
113 (LOINC)[6,7] and the *Fast Healthcare Interoperability Resources* (FHIR)[8,9] standard. The extension  
114 modules were developed in close alignment with the GECCO dataset to ensure interoperability and  
115 compatibility with existing definitions.

116 We here describe the consensus-based data element selection and data format definition workflow  
117 that we applied in close collaboration between medical experts from *immunology, pediatrics, and*

118 *cardiology* domains on the content definition side and medical information specialists and FHIR  
119 developers on the technical side. This workflow may serve as a blueprint for further development of  
120 consensus-based data set definitions.

## 121 [Methods](#)

### 122 [Workflow definition](#)

123 We aimed to develop a workflow to create dataset definitions that are (i) content-wise as relevant as  
124 possible to a specific field of study and (ii) universally usable across computer systems, institutions,  
125 and countries, i.e., interoperable. We based the specification of the workflow on our experience with  
126 the definition of the German Corona Consensus (GECCO) dataset, where health professionals from 50  
127 institutions (university hospitals, professional associations and other relevant organizations)  
128 participated to define the most relevant data elements for general scope COVID-19-related research  
129 [2]. To fulfil the first requirement (relevancy), we decided to leave the full responsibility of data  
130 element selection to groups of medical professionals of the respective specialty, with only minimal  
131 interference by the development team. We have deliberately left the exact process open of how the  
132 group of medical experts may select the data elements (e.g., literature review, focus groups,  
133 consensus-based processes) to allow maximal flexibility of the dataset definition workflow with  
134 respect to the medical experts' values and preferences. To fulfil the second requirement  
135 (interoperability), we adopted a model loosely based on Jacobsen's workflow for data FAIRification  
136 [10], with mapping, quality assurance and publication steps as outlined in detail below.

### 137 [Selection of data items](#)

138 The content of the domain-specific research datasets was defined by medical domain experts in a  
139 transparent workflow (Figure 1). The involvement of the medical domain experts as the end-users of  
140 the data to be provided ensured that the contents of the datasets are aligned to the actual research  
141 needs. In our project, the so-called subject- and organ-specific working groups of the national  
142 pandemic cohort net (NAPKON) served as the domain-specific groups of medical experts. These groups  
143 were established by voluntary association of medical experts from the respective medical specialty in  
144 the context of the nationwide NAPKON project in Germany. Each of the subject- and organ-specific  
145 working groups elected a board, and all communication between the dataset developers and the  
146 working groups was organized and carried out via the working groups' board. In preparation for the  
147 GECCO extension modules, we invited the subject- and organ-specific groups for *immunology*,  
148 *pediatrics* and *cardiology* to provide up to 50 data elements with up to 10 response items each that  
149 were, in the view of the medical experts, the most relevant data elements to patient-related COVID-  
150 19 research in their medical specialty and that were not already included in the GECCO core dataset.

151 If necessary, more data items or response options could be provided in coordination with the  
152 development team. The provided data items were then reviewed by the development team and a first  
153 definition of the contents of the extension module was returned to the respective subject- and organ-  
154 specific working group for approval or change requests. After approval by the subject- and organ-  
155 specific working group, the definition of the extension module content was considered finalized.

## 156 [Development of the standardized data formats](#)

157 To map the data items selected by the subject- and organ-specific working groups to international  
158 standard vocabularies, we performed a consensus-based mapping procedure, where every concept  
159 was mapped to appropriate vocabularies SNOMED CT for general concepts [11], LOINC for  
160 observations [7], *International Statistical Classification of Diseases and Related Health Problems, 10<sup>th</sup>*  
161 *revision, German modification* (ICD-10-GM) for diagnoses [12], *Anatomical Therapeutic Chemical*  
162 *Classification System* (ATC) for Germany for drugs and active ingredients [13], *Unified Code for Units*  
163 *of Measure* (UCUM) for measurement units [14] by two medical information scientists independently.  
164 Ambiguities and non-matching mappings were then discussed within the development team and in  
165 close collaboration with the medical experts of the subject- and organ-specific working groups until  
166 consensus was achieved. The data item-to-concept mappings were annotated on ART-DECOR, an  
167 open-source collaboration platform for creating and maintaining dataset element descriptions [15].

168 As for the GECCO dataset, the format for data exchange was specified using HL7 FHIR resources. The  
169 mapping of data items to FHIR resources was performed in an iterative, consensus-based workflow  
170 among the development team. Wherever possible, published FHIR profiles from the GECCO dataset,  
171 from the Medical Informatics Initiative (MII) [16] or the National Association of Statutory Health  
172 Insurance Physicians (“Kassenärztliche Bundesvereinigung”; KBV) [17] – in this order of priority –  
173 served as the base definition for the future extension module profiles.

174 The profiles and value sets were specified using the FHIR Shorthand (FSH) language (version 1.2.0) and  
175 translated to Structure Definition JSON files using the HL7 FSH SUSHI software package (version 2.2.3)  
176 [18,19]. We required that at least one exemplary instance be defined for every profile. Syntactic  
177 validation of the profiles and value sets definitions was performed using the error-free conversion of  
178 the FSH files to JSON using SUSHI and subsequent validation of each profile with their defined instances  
179 using the HL7 FHIR validator as implemented in the FHIR Shorthand Validator Python package (version  
180 0.2.2) [20]. After successful syntactic validation of a set of profiles, the profiles were subjected to a  
181 two-stage review process as follows. First, the profiles and corresponding value sets and extensions  
182 were internally reviewed for semantic appropriateness with the GECCO core developer (JS). After all  
183 necessary changes and approval by the internal reviewer, the profiles were subjected to the second  
184 review round by an external FHIR development expert. Subsequent to necessary corrections and

185 approval of the external reviewer, the respective profiles together with their value sets and optionally  
186 extensions and code systems were considered finalized and published to the main branch of the git  
187 repository.

188 The whole development process was performed collaboratively on GitHub. Syntactic validation of the  
189 profiles was performed by continuous integration/continuous development (CI/CD) workflows  
190 implemented as GitHub actions. Semantic validation during the internal and external review rounds  
191 was performed using pull requests to two different git branches. After the final approval, profiles and  
192 value sets were merged into the main branch of the extension module's repository, which served as  
193 the publication branch of the respective module. Since then, maintenance requests and updates of the  
194 extension modules are handled via GitHub issues. All kinds of relevant changes become a subject of  
195 the internal review as defined above; major changes (e.g., non-technical corrections) are additionally  
196 exposed to the external review.

197 Implementation guides were created for all three extension modules using the FHIR IG publisher tool  
198 and a customized template for the implementation guide's HTML pages [21]. The implementation  
199 guides are published to GitHub pages and remain automatically synchronized with the main branch of  
200 the respective repository via CI/CD workflows.

201



## 202 Results

### 203 Dataset definition workflow

204 We developed an interdisciplinary, iterative, consensus-based workflow for the definition of domain-  
205 specific COVID-19 research datasets based on two key requirements: The first key requirement for the  
206 content of the datasets was that the content definition (i.e., selection of data elements) was to be  
207 performed in full responsibility by a group of medical experts to ensure that the selected data elements  
208 are truly those that are required in research of their respective medical specialty. The second key  
209 requirement was to produce FAIR (Findable, Accessible, Interoperable, Reusable) digital assets [22]:  
210 The dataset definitions shall be represented in FHIR profiles and implementation guides and these shall  
211 be registered on open platforms (Findable), they shall be retrievable through open, free, standard  
212 protocols (Accessible), they shall use only standard, international medical terminologies such as  
213 SNOMED CT and LOINC (Interoperable) and they shall be released with rich usage guides and examples  
214 (FHIR implementation guide) and under a permissive license (Reusable).

215 To fulfill these requirements, the dataset definition workflow consists of four phases: Content  
216 definition, mapping, quality assurance and publication (Figure 1). In the content definition phase, a  
217 group of medical experts from a particular medical specialty are approached by the development team  
218 consisting of medical information specialists and asked to provide a list of the data elements that are  
219 most relevant to patient-related COVID-19 research in their respective medical specialty. How the  
220 medical expert group compiles the list in detail is left to their discretion (e.g., based on systematic  
221 literature review, or Delphi consensus processes). The medical information scientists only review the  
222 provided lists for consistency and redundancy and compile the final content definition in agreement  
223 with the medical experts group. In the mapping phase, all data elements are then mapped to  
224 international terminologies in consultation with the group of medical experts. Based on these a logical  
225 model and the mappings of data elements to FHIR resources are established. In the quality assurance  
226 phase, the FHIR specifications are syntactically validated using automated software tools and then  
227 subjected to a two-staged review process with two individual data interoperability and harmonization  
228 experts to validate the specifications semantically, i.e., validate that the data elements defined by the  
229 group of medical experts are appropriately mapped to international standards. After any required  
230 changes, the logical model and the FHIR implementation guide are published openly accessible to the  
231 research community in repositories that fulfill the FAIR criteria as closely as possible, such as ART-  
232 DECOR[15] for logical models and GitHub or the FHIR Implementation Guide registry for the  
233 implementation guide[23].

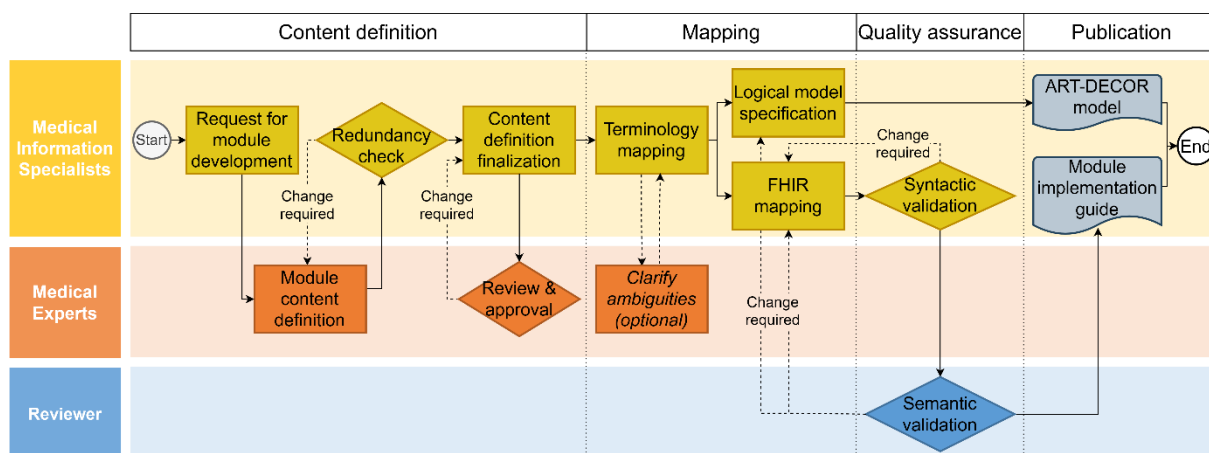

234  
 235 *Figure 1 Flowchart of the consensus-based, interdisciplinary dataset definition and mapping workflow*  
 236 *for the domain-specific COVID-19 research datasets.*

237  
 238 **Datasets contents**

239 **Groups of medical experts**  
 240 In the context of the national pandemic cohort net (“Nationales Pandemie Kohorten Netz”; NAPKON)  
 241 project of the German COVID-19 Research Network of University Medicine [24], so-called subject- and  
 242 organ-specific working groups were established by the voluntary association of medical experts from  
 243 different medical specialties. In preparation for the domain-specific dataset definitions that extend the  
 244 GECCO core dataset, the working groups for *immunology*, *pediatrics*, and *cardiology* were invited by  
 245 the dataset development group to provide up to 50 data elements with up to 10 response items each  
 246 that were of particular interest to their field concerning patient-related COVID-19 research and that  
 247 were not already included in the GECCO core dataset. For the *immunization* dataset definition,  
 248 physicians from the “NUM-COVIM” study for the determination and use of SARS-CoV-2 immunity [25–  
 249 27] assumed the role of the organ-specific working group, as no such working group had been  
 250 established previously.

251

252 [Overview](#)

253 The domain-specific dataset definitions developed in this work extend the GECCO core dataset by a  
 254 total number of 48 data items for the *immunization* extension module, 150 for the *pediatrics* extension  
 255 module, and 52 for the *cardiology* extension module. These data items have been collected via an  
 256 iterative consensus-based approach from the respective subject- and organ-specific working groups  
 257 and belonging to 10 of the 13 data categories of the GECCO dataset (Table 1). Data elements and  
 258 number of items for each individual extension module are shown in Table 2, Table 3, and Table 4. The  
 259 full lists of items are shown in the supplementary tables 1, 2, and 3.

| GECCO Data Category                   | GECCO Extension Module |            |            |
|---------------------------------------|------------------------|------------|------------|
|                                       | Immunization           | Pediatrics | Cardiology |
| Anamnesis & Risk factors              | 13                     | 21         | 6          |
| Complications                         | 24                     | 47         | 7          |
| Demographics                          | -                      | 6          | -          |
| Epidemiological factors               | -                      | -          | -          |
| Imaging                               | -                      | 2          | 36         |
| Laboratory values                     | 1                      | 27         | 2          |
| Medication                            | 1                      | 35         | 1          |
| Onset of illness & admission          | 6                      | 2          | -          |
| Outcome at discharge                  | -                      | -          | -          |
| Study enrollment & Inclusion criteria | -                      | -          | -          |
| Symptoms                              | -                      | 9          | -          |
| Therapy                               | 2                      | 1          | -          |
| Vital signs                           | 1                      | -          | -          |
| <b>Total items</b>                    | <b>48</b>              | <b>150</b> | <b>52</b>  |

260 *Table 1 Number of data items per GECCO dataset category for each extension module.*

261 All data items were mapped to the appropriate FHIR resources Observation, Condition, Procedure,  
 262 MedicationStatement, Encounter, Questionnaire, QuestionnaireResponse, Immunization,  
 263 ImagingStudy, List, and Specimen, and 26, 14, and 18 profiles (25, 17, and 12 value sets) were created  
 264 for the *immunization*, *pediatrics*, and *cardiology* extension module, respectively. The data items that  
 265 were already part of the GECCO dataset and that were not removed during the data selection step  
 266 were taken over from GECCO and referenced as such in the implementation guides.

267 The implementation guides for the three extension module have been published on GitHub pages [28–  
 268 30]. The source FHIR ShortHand (FSH) files have been published on GitHub [31–33]. Logical models and  
 269 dataset descriptions are hosted on ART-DECOR, an open collaboration platform for modelling dataset  
 270 definitions and their descriptions and terminology bindings [34–36].

271

| Category                                  | Data Element                                         | FHIR Resource        | # items   |
|-------------------------------------------|------------------------------------------------------|----------------------|-----------|
| <b>Anamnesis</b>                          | Chemotherapy                                         | Procedure            | 1         |
|                                           | Immunosuppressive therapy                            | Procedure            | 1         |
|                                           | Regular Alcohol Intake                               | Observation          | 2         |
| <b>COVID-19 infection &amp; treatment</b> | Disease course                                       | Encounter, Procedure | 5         |
|                                           | SARS-CoV-2 infection                                 | Condition            | 1         |
|                                           | SARS-CoV-2 variant                                   | Observation          | 1         |
| <b>Immunization</b>                       | Contraindications to immunization                    | Immunization         | 2         |
|                                           | Immunizations performed                              | Immunization         | 3         |
|                                           | Reason for immunization                              | Immunization         | 5         |
|                                           | Willingness to receive additional immunization doses | Observation          | 1         |
| <b>Immunization reactions</b>             | Analgesic or antipyretic drug intake                 | MedicationStatement  | 1         |
|                                           | Body temperature                                     | Observation          | 1         |
|                                           | Complications after immunization                     | Observation          | 5         |
|                                           | Medical treatment for adverse reactions              | Encounter            | 3         |
|                                           | Symptoms after Vaccination                           | Condition            | 16        |
| <b>Total</b>                              |                                                      |                      | <b>48</b> |

272 *Table 2 Types of data elements in the immunization extension module extending the GECCO core*  
 273 *dataset. Shown are the data elements and the FHIR resource they have been mapped to, as well as the*  
 274 *number of items for each data element (i.e., different response options).*

| Category                 | Data Element                          | FHIR Resource             | # items    |
|--------------------------|---------------------------------------|---------------------------|------------|
| <b>Complications</b>     | Complications to COVID-19             | Condition                 | 47         |
| <b>Demographics</b>      | Body measures                         | Observation               | 6          |
| <b>Imaging</b>           | Echocardiography                      | Procedure, Imaging Study  | 1          |
|                          | PET-CT                                | Procedure, Imaging Study  | 1          |
| <b>Immunization</b>      | Immunizations performed               | Immunization              | 2          |
| <b>Laboratory values</b> | Laboratory values                     | Observation               | 27         |
| <b>Medical history</b>   | Chronic Hematologic Diseases          | Condition                 | 8          |
|                          | Chronic Kidney Diseases               | Condition                 | 2          |
|                          | Congenital Disease                    | Condition                 | 1          |
|                          | Gastrointestinal Diseases             | Condition                 | 6          |
|                          | Medical History Stem Cells Transplant | Condition                 | 2          |
| <b>Medication</b>        | Medication                            | MedicationStatement, List | 35         |
| <b>Symptoms</b>          | COVID-19 Symptoms                     | Condition                 | 9          |
| <b>Therapy</b>           | Hospitalization                       | Observation               | 2          |
|                          | Thoracic Drainage                     | Procedure                 | 1          |
| <b>Total</b>             |                                       |                           | <b>150</b> |

275 *Table 3 Types of data elements in the pediatrics extension module extending the GECCO core dataset.*  
 276 *Shown are the data elements and the FHIR resource they have been mapped to, as well as the number*  
 277 *of items for each data element (i.e., different response options).*

278

| Category                              | Data Element                          | FHIR Resource       | # items   |
|---------------------------------------|---------------------------------------|---------------------|-----------|
| <b>Anamnesis</b>                      | Chronic cardiologic diseases          | Condition           | 6         |
| <b>COVID-19-related complications</b> | Cardiologic complications of COVID-19 | Condition           | 7         |
| <b>Echocardiography</b>               | Echocardiography findings             | Observation         | 20        |
|                                       | Echocardiography procedure            | Procedure           | 3         |
| <b>Electrocardiography</b>            | Electrocardiography findings          | Observation         | 11        |
|                                       | Electrocardiography procedure         | Procedure           | 2         |
| <b>Laboratory Values</b>              | Laboratory values                     | Observation         | 2         |
| <b>Medication</b>                     | Angiotensin receptor antagonist       | MedicationStatement | 1         |
| <b>Total</b>                          |                                       |                     | <b>52</b> |

279 *Table 4 Types of data elements in the cardiology extension module extending the GECCO core dataset.*  
280 *Shown are the data elements and the FHIR resource they have been mapped to, as well as the number*  
281 *of items for each data element (i.e., different response options).*

## 282 Discussion

283 We here present an interdisciplinary, iterative, consensus-based workflow to the definition of research  
284 datasets, focusing on creating datasets with the most relevant data elements for a particular field of  
285 study and on creating universally usable datasets according to the FAIR principles [22]. We applied the  
286 workflow to develop three GECCO extension modules that contain data items relevant for COVID-19-  
287 related patient research in the *immunization*, *pediatrics*, and *cardiology* fields. These extension  
288 modules complement the GECCO core dataset for domain-specified research. The data items are  
289 represented in HL7 FHIR profiles and use international terminologies, to ensure a harmonized,  
290 standardized, and interoperable dataset definition for these medical domains. The provision of data  
291 according to the extension modules introduced in this article will enable cross-institutional and cross-  
292 country data collection and collaborative research with a particular focus in *immunization*, *pediatrics*,  
293 and *cardiology*.

294 We have specified and implemented an interdisciplinary, iterative, consensus-based workflow for the  
295 selection of data items and the development of the dataset definition. The close collaboration and the  
296 constant feedback loops with domain experts from the respective medical specialties right from the  
297 beginning of the project, as performed here, are key for the successful development of a useful dataset  
298 definition. Indeed, since the selection of relevant data items was driven by the end-users of the  
299 dataset, who are the researchers that later will be using the data for their specialized areas of research,  
300 the semantic usability of the datasets is guaranteed. Likewise, having medical information specialists  
301 develop the formal dataset specification ensures technical interoperability and usability of the dataset  
302 definition.

303 Next to the successful development of dataset definitions, several factors determine a successful  
304 deployment or use of the developed extension modules [37]. First and most importantly clear and  
305 concise documentation of how to implement and provide data using the dataset definition is required.  
306 For FHIR-based dataset definitions, so-called implementation guides are used to provide both a  
307 narrative overview as well as technical details on the dataset definition [38]. Thus, we have created  
308 and published implementation guides for each of the here-developed extension modules. Second, the  
309 example implementations of the extension modules serve as a blueprint for developers and data  
310 engineers who implement the extension modules for their clinical databases. From our experience  
311 with the implementation of the GECCO dataset, well-defined example data items may be of equal if  
312 not higher importance than the technical description of the dataset specification, as developers and  
313 engineers tend to use the examples as blueprints for their implementation. Thus, we equipped every  
314 FHIR profile defined in the extension modules with at least one example. These examples are  
315 incorporated and issued within the implementation guides of the modules. Specifically, we aimed to

316 provide one example for each different category of response option per profile. Thirdly, the actual  
317 implementation of the extension modules should be part of follow-up infrastructure projects to supply  
318 funding and resources for filling the dataset definition with actual data. For the GECCO dataset, this is  
319 ensured by follow-up projects of the German COVID-19 Research Network of University Medicine  
320 (“Netzwerk Universitätsmedizin”), such as CODEX+, which includes several implementation tasks that  
321 are actively using the GECCO dataset items [39] and further projects [40–43]. Fourth, once the dataset  
322 definitions are implemented and leveraged in use cases, additional demands to the dataset are likely  
323 raised or issues with existing definitions are revealed. The maintenance of existing definitions (e.g.,  
324 performing technical corrections or even evolving the definitions or adding new items) is, therefore,  
325 necessary and must be organized and funded. Last, successful use of the extension modules is also  
326 highly dependent on the degree of interoperability of the dataset definitions in the first place [1,44,45].  
327 For example, the use of questionnaires to assess certain features is common in clinical research.  
328 However, depending on the exact wording of the question and the number and wording of response  
329 options, results from different studies might not be directly comparable although they assessed the  
330 same features, as the questions and response options differ between studies. In the presented  
331 extension modules, several items were at first specified in a questionnaire-like fashion and direct  
332 implementation of these as Questionnaire resources in FHIR would have limited the applicability of  
333 such data elements, especially when aiming to map these elements from an electronic health records  
334 (EHR) system. In these cases, we revised the data elements specification to use interoperable concepts  
335 rather than questions. Here, repeated consultation with and final approval of the group of medical  
336 experts was key to be able to convert questions into interoperable concepts that convey the same  
337 information as intended by the content definition of the group of medical experts. In general, we  
338 recommend not to use Questionnaire/QuestionnaireResponse FHIR profiles in cases where the  
339 information to be represented can be modeled using more general, interoperable concepts and FHIR  
340 resources.

## 341 Conclusion

342 We here introduce the development workflow and the resulting dataset definitions for GECCO  
343 extension modules for the *immunization*, *pediatrics*, and *cardiology* domains. We have defined and  
344 implemented a workflow in which interdisciplinary teams of medical domain experts, medical  
345 information scientists and FHIR developers closely collaborate in an iterative, consensus-based fashion  
346 for the successful development of useful and interoperable dataset definitions. This workflow may  
347 serve as a blueprint for further dataset definition projects, such as further dataset definitions for  
348 extending the GECCO core dataset. The extension modules described in this work have been validated  
349 and published. Their implementation and active use are anticipated in the context of current  
350 nationwide COVID-19 research networks in Germany.

## 351 Acknowledgements

352 The NAPKON (“Nationales Pandemie Kohorten Netz”, German National Pandemic Cohort Network)  
353 project is funded under a scheme issued by the Network of University Medicine (Nationales  
354 Forschungsnetzwerk der Universitätsmedizin (NUM)) by the Federal Ministry of Education and  
355 Research of Germany (Bundesministerium für Bildung und Forschung (BMBF)) grant number  
356 01KX2021. The funding body did not take a role in the design of the study, development of the dataset  
357 or in the writing of the manuscript.

358 We thank Yannick Börner for his valuable contribution to the definition of the FHIR profiles. We thank  
359 all members of the subject- and organ-specific working groups.

360

## 361 Conflict of interests

362 The authors declare that they have no competing interests.

## 363 Data Availability

364 The implementation guides for the three extension modules have been published on GitHub pages  
365 [28–30]. The source FHIR ShortHand (FSH) files have been published on GitHub [31–33]. Dataset  
366 descriptions can be found on ART-DECOR [34–36]

## 367 Authors’ contributions

368 All authors contributed to the development of the extension modules. GL, TH, SB, LR, JS, AB, ST  
369 performed terminology mapping, FHIR profiling and critical review of the concept and resource  
370 mappings. TH, SB, LR defined the datasets in ART-DECOR. DH, FK, LES, FB, FE, NT, RB, AF, MD developed  
371 and compiled the list of data items for the datasets. SR, LL and MU coordinated the project and the  
372 consensus finding process within and between working groups. JJV, CvK, ST conceived the work. GL  
373 drafted the manuscript. All authors read and approved the final manuscript.

374



## 375 References

- 376 1. Lehne M, Sass J, Essenwanger A, Schepers J, Thun S. Why digital medicine depends on  
377 interoperability. *Npj Digit Med Nature Publishing Group*; 2019 Aug 20;2(1):1–5. doi:  
378 10.1038/s41746-019-0158-1
- 379 2. Sass J, Bartschke A, Lehne M, Essenwanger A, Rinaldi E, Rudolph S, Heitmann KU, Vehreschild JJ,  
380 von Kalle C, Thun S. The German Corona Consensus Dataset (GECCO): a standardized dataset for  
381 COVID-19 research in university medicine and beyond. *BMC Med Inform Decis Mak* 2020 Dec  
382 21;20(1):341. doi: 10.1186/s12911-020-01374-w
- 383 3. Gruendner J, Deppenwiese N, Folz M, Köhler T, Kroll B, Prokosch H-U, Rosenau L, Rühle M, Scheidl  
384 M-A, Schüttler C, Sedlmayr B, Twrdik A, Kiel A, Majeed RW. The Architecture of a Feasibility Query  
385 Portal for Distributed COVID-19 Fast Healthcare Interoperability Resources (FHIR) Patient Data  
386 Repositories: Design and Implementation Study. *JMIR Med Inform* 2022 May 25;10(5):e36709.  
387 doi: 10.2196/36709
- 388 4. Sedlmayr B, Sedlmayr M, Kroll B, Prokosch H-U, Gruendner J, Schüttler C. Improving COVID-19  
389 Research of University Hospitals in Germany: Formative Usability Evaluation of the CODEX  
390 Feasibility Portal. *Appl Clin Inform Georg Thieme Verlag KG*; 2022 Mar;13(2):400–409. doi:  
391 10.1055/s-0042-1744549
- 392 5. Millar J. The Need for a Global Language – SNOMED CT Introduction. *Nurs Inform* 2016 IOS Press;  
393 2016;683–685. doi: 10.3233/978-1-61499-658-3-683
- 394 6. Fiebeck J, Gietzelt M, Ballout S, Christmann M, Fradziak M, Laser H, Ruppel J, Schönfeld N,  
395 Teppner S, Gerbel S. Implementing LOINC - Current Status and Ongoing Work at a Medical  
396 University. *Stud Health Technol Inform* 2019 Sep 3;267:59–65. PMID:31483255
- 397 7. McDonald CJ, Huff SM, Suico JG, Hill G, Leavelle D, Aller R, Forrey A, Mercer K, DeMoor G, Hook  
398 J, Williams W, Case J, Maloney P, for the Laboratory LOINC Developers. LOINC, a Universal  
399 Standard for Identifying Laboratory Observations: A 5-Year Update. *Clin Chem* 2003 Apr  
400 1;49(4):624–633. doi: 10.1373/49.4.624
- 401 8. Lehne M, Luijten S, Vom Felde Genannt Imbusch P, Thun S. The Use of FHIR in Digital Health - A  
402 Review of the Scientific Literature. *Stud Health Technol Inform* 2019 Sep 3;267:52–58.  
403 PMID:31483254
- 404 9. Vorisek CN, Lehne M, Klopfenstein SAI, Mayer PJ, Bartschke A, Haese T, Thun S. Fast Healthcare  
405 Interoperability Resources (FHIR) for Interoperability in Health Research: Systematic Review.  
406 *JMIR Med Inform* 2022 Jul 19;10(7):e35724. doi: 10.2196/35724
- 407 10. Jacobsen A, Kaliyaperumal R, da Silva Santos LOB, Mons B, Schultes E, Roos M, Thompson M. A  
408 Generic Workflow for the Data FAIRification Process. *Data Intell* 2020 Jan 1;2(1–2):56–65. doi:  
409 10.1162/dint\_a\_00028
- 410 11. SNOMED CT. SNOMED. Available from: <https://www.snomed.org/> [accessed Mar 16, 2022]
- 411 12. Bundesinstitut für Arzneimittel und Medizinprodukte (BfArM). ICD-10-GM. Available from:  
412 [https://www.bfarm.de/EN/Code-systems/Classifications/ICD/ICD-10-GM/\\_node.html](https://www.bfarm.de/EN/Code-systems/Classifications/ICD/ICD-10-GM/_node.html) [accessed  
413 Mar 16, 2022]

- 414 13. Bundesinstitut für Arzneimittel und Medizinprodukte (BfArM). ATC. Available from:  
415 [https://www.bfarm.de/DE/Kodiersysteme/Klassifikationen/ATC/\\_node.html](https://www.bfarm.de/DE/Kodiersysteme/Klassifikationen/ATC/_node.html) [accessed Mar 16,  
416 2022]
- 417 14. The Unified Code for Units of Measure. Available from: <https://ucum.org/trac> [accessed Mar 16,  
418 2022]
- 419 15. art-decor.org. Available from: [https://www.art-decor.org/mediawiki/index.php/Main\\_Page](https://www.art-decor.org/mediawiki/index.php/Main_Page)  
420 [accessed Mar 16, 2022]
- 421 16. Medizininformatik Initiative - SIMPLIFIER.NET. Available from:  
422 <https://simplifier.net/organization/koordinationsstellemii> [accessed Mar 15, 2022]
- 423 17. Kassenärztliche Bundesvereinigung (KBV) - SIMPLIFIER.NET. Available from:  
424 <https://simplifier.net/organization/kassenrztlichebundesvereinigungkbv> [accessed Mar 15,  
425 2022]
- 426 18. FHIR Shorthand. Available from: <http://hl7.org/fhir/uv/shorthand/> [accessed Apr 25, 2022]
- 427 19. SUSHI Unshortens Short Hand Inputs. 2022. Available from: <https://github.com/FHIR/sushi>  
428 [accessed Apr 25, 2022]
- 429 20. Lichtner G. FHIR Shorthand Validator. 2021. Available from: [https://github.com/glichtner/fsh-](https://github.com/glichtner/fsh-validator)  
430 [validator](https://github.com/glichtner/fsh-validator) [accessed Mar 15, 2022]
- 431 21. napkon-module-template. 2022. Available from: [https://github.com/BIH-CEI/napkon-module-](https://github.com/BIH-CEI/napkon-module-template)  
432 [template](https://github.com/BIH-CEI/napkon-module-template) [accessed Mar 15, 2022]
- 433 22. Wilkinson MD, Dumontier M, Aalbersberg IJ, Appleton G, Axton M, Baak A, Blomberg N, Boiten  
434 J-W, da Silva Santos LB, Bourne PE, Bouwman J, Brookes AJ, Clark T, Crosas M, Dillo I, Dumon O,  
435 Edmunds S, Evelo CT, Finkers R, Gonzalez-Beltran A, Gray AJG, Groth P, Goble C, Grethe JS,  
436 Heringa J, 't Hoen PAC, Hooft R, Kuhn T, Kok R, Kok J, Lusher SJ, Martone ME, Mons A, Packer AL,  
437 Persson B, Rocca-Serra P, Roos M, van Schaik R, Sansone S-A, Schultes E, Sengstag T, Slater T,  
438 Strawn G, Swertz MA, Thompson M, van der Lei J, van Mulligen E, Velterop J, Waagmeester A,  
439 Wittenburg P, Wolstencroft K, Zhao J, Mons B. The FAIR Guiding Principles for scientific data  
440 management and stewardship. *Sci Data Nature Publishing Group*; 2016 Mar 15;3(1):160018. doi:  
441 10.1038/sdata.2016.18
- 442 23. Implementation Guide Registry. Available from: <http://fhir.org/guides/registry/> [accessed Nov 3,  
443 2022]
- 444 24. Schons M, Pilgram L, Reese J-P, Stecher M, Anton G, Appel KS, Bahmer T, Bartschke A,  
445 Bellinghausen C, Bernemann I, Brechtel M, Brinkmann F, Brünn C, Dhillon C, Fiessler C, Geisler R,  
446 Hamelmann E, Hansch S, Hanses F, Hanß S, Herold S, Heyder R, Hofmann A-L, Hopff SM, Horn A,  
447 Jakob C, Jiru-Hillmann S, Keil T, Khodamoradi Y, Kohls M, Kraus M, Krefting D, Kunze S, Kurth F,  
448 Lieb W, Lippert LJ, Lorbeer R, Lorenz-Depiereux B, Maetzler C, Miljukov O, Nauck M, Pape D,  
449 Püntmann V, Reinke L, Römmele C, Rudolph S, Sass J, Schäfer C, Schaller J, Schattschneider M,  
450 Scheer C, Scherer M, Schmidt S, Schmidt J, Seibel K, Stahl D, Steinbeis F, Störk S, Tauchert M,  
451 Tebbe JJ, Thibeault C, Toepfner N, Ungethüm K, Vadasz I, Valentin H, Wiedmann S, Zoller T, Nagel  
452 E, Krawczak M, von Kalle C, Illig T, Schreiber S, Witzenrath M, Heuschmann P, Vehreschild JJ,  
453 NAPKON Research Group. The German National Pandemic Cohort Network (NAPKON): rationale,  
454 study design and baseline characteristics. *Eur J Epidemiol* 2022 Aug 1;37(8):849–870. doi:  
455 10.1007/s10654-022-00896-z

- 456 25. Hillus D, Schwarz T, Tober-Lau P, Vanshylla K, Hastor H, Thibeault C, Jentzsch S, Helbig ET, Lippert  
457 LJ, Tscheak P, Schmidt ML, Riege J, Solarek A, Kalle C von, Dang-Heine C, Gruell H, Kopankiewicz  
458 P, Suttorp N, Drosten C, Bias H, Seybold J, Al-Rim B, Bardtke L, Beheim-Schwarzbach JI, Behn K,  
459 Bergfeld L, Bethke N, Bleicker T, Briesemeister D, Brumhard S, Conrad C, Dieckmann S, Frey D,  
460 Gabelich J-A, Georg P, Gläser U, Hasler L, Hetey A, Hiller AL, Horn A, Hülso C, Kegel L, Koch W,  
461 Krannich A, Kroneberg P, Lisy M, Mackeldanz P, Maeß B, Münn F, Olk N, Peiser C, Pohl K, Hermel  
462 A, Rönnefarth M, Rubisch C, Rezza AS, Schellenberger I, Schenkel V, Schlesinger J, Schmidt S,  
463 Schwanitz G, Sinnigen A-S, Stubbemann P, Tesch J, Treue D, Wendisch D, Zvorc S, Klein F, Kurth  
464 F, Corman VM, Sander LE. Safety, reactogenicity, and immunogenicity of homologous and  
465 heterologous prime-boost immunisation with ChAdOx1 nCoV-19 and BNT162b2: a prospective  
466 cohort study. *Lancet Respir Med Elsevier*; 2021 Nov 1;9(11):1255–1265. PMID:34391547
- 467 26. Tober-Lau P, Schwarz T, Vanshylla K, Hillus D, Gruell H, Suttorp N, Landgraf I, Kappert K, Seybold  
468 J, Drosten C, Klein F, Kurth F, Sander LE, Corman VM. Long-term immunogenicity of BNT162b2  
469 vaccination in older people and younger health-care workers. *Lancet Respir Med Elsevier*; 2021  
470 Nov 1;9(11):e104–e105. PMID:34687656
- 471 27. NUM-COVIM study. Available from: <https://covim-netzwerk.de/> [accessed Mar 16, 2022]
- 472 28. NAPKON Cardiology Module Implementation Guide. Available from: [https://bih-  
473 cei.github.io/napkon-cardiology/](https://bih-cei.github.io/napkon-cardiology/) [accessed Mar 15, 2022]
- 474 29. NAPKON Pediatrics Module Implementation Guide. Available from: [https://bih-  
475 cei.github.io/napkon-pediatrics/](https://bih-cei.github.io/napkon-pediatrics/) [accessed Mar 15, 2022]
- 476 30. NAPKON Vaccination Module Implementation Guide. Available from: [https://bih-  
477 cei.github.io/napkon-vaccination/](https://bih-cei.github.io/napkon-vaccination/) [accessed Mar 15, 2022]
- 478 31. NAPKON Cardiology Module. 2022. Available from: [https://github.com/BIH-CEI/napkon-  
479 cardiology](https://github.com/BIH-CEI/napkon-cardiology) [accessed Mar 15, 2022]
- 480 32. NAPKON Pediatrics Module. 2022. Available from: [https://github.com/BIH-CEI/napkon-  
481 pediatrics](https://github.com/BIH-CEI/napkon-pediatrics) [accessed Mar 15, 2022]
- 482 33. NAPKON Vaccination Module. 2022. Available from: [https://github.com/BIH-CEI/napkon-  
483 vaccination](https://github.com/BIH-CEI/napkon-vaccination) [accessed Mar 15, 2022]
- 484 34. ART-DECOR: NAPKON Cardiology Module. Available from: [https://art-decor.org/art-  
485 decor/decor-datasets--covid19f-  
486 ?id=2.16.840.1.113883.3.1937.777.53.1.2&effectiveDate=2020-08-  
487 12T00%3A00%3A00&conceptId=2.16.840.1.113883.3.1937.777.53.2.250&conceptEffectiveDat  
488 e=2021-02-16T13%3A25%3A43&language=en-US](https://art-decor.org/art-decor/decor-datasets--covid19f-?id=2.16.840.1.113883.3.1937.777.53.1.2&effectiveDate=2020-08-12T00%3A00%3A00&conceptId=2.16.840.1.113883.3.1937.777.53.2.250&conceptEffectiveDate=2021-02-16T13%3A25%3A43&language=en-US) [accessed Mar 16, 2022]
- 489 35. ART-DECOR: NAPKON Pediatrics Module. Available from: [https://art-decor.org/art-decor/decor-  
490 datasets--covid19f-?id=2.16.840.1.113883.3.1937.777.53.1.2&effectiveDate=2020-08-  
491 12T00%3A00%3A00&conceptId=2.16.840.1.113883.3.1937.777.53.2.453&conceptEffectiveDat  
492 e=2021-08-25T12%3A45%3A26&language=en-US](https://art-decor.org/art-decor/decor-datasets--covid19f-?id=2.16.840.1.113883.3.1937.777.53.1.2&effectiveDate=2020-08-12T00%3A00%3A00&conceptId=2.16.840.1.113883.3.1937.777.53.2.453&conceptEffectiveDate=2021-08-25T12%3A45%3A26&language=en-US) [accessed Mar 16, 2022]
- 493 36. ART-DECOR: NAPKON Vaccination Module. Available from: [https://art-decor.org/art-  
494 decor/decor-datasets--covid19f-  
495 ?id=2.16.840.1.113883.3.1937.777.53.1.2&effectiveDate=2020-08-  
496 12T00%3A00%3A00&conceptId=2.16.840.1.113883.3.1937.777.53.2.453&conceptEffectiveDat  
497 e=2021-08-25T12%3A45%3A26&language=en-US](https://art-decor.org/art-decor/decor-datasets--covid19f-?id=2.16.840.1.113883.3.1937.777.53.1.2&effectiveDate=2020-08-12T00%3A00%3A00&conceptId=2.16.840.1.113883.3.1937.777.53.2.453&conceptEffectiveDate=2021-08-25T12%3A45%3A26&language=en-US) [accessed Mar 16, 2022]

- 498 37. Kush RD, Warzel D, Kush MA, Sherman A, Navarro EA, Fitzmartin R, Pétavy F, Galvez J, Becnel LB,  
499 Zhou FL, Harmon N, Jauregui B, Jackson T, Hudson L. FAIR data sharing: The roles of common  
500 data elements and harmonization. *J Biomed Inform* 2020 Jul 1;107:103421. doi:  
501 10.1016/j.jbi.2020.103421
- 502 38. Shivers J, Amlung J, Ratanaprayul N, Rhodes B, Biondich P. Enhancing narrative clinical guidance  
503 with computer-readable artifacts: Authoring FHIR implementation guides based on WHO  
504 recommendations. *J Biomed Inform* 2021 Aug 25;122:103891. PMID:34450285
- 505 39. Lichtner G, Jurth C, Alper BS, Spies C, Boeker M, Meerpohl JJ, Dincklage F von. Representation of  
506 evidence-based clinical practice guideline recommendations on FHIR. medRxiv; 2022. p.  
507 2022.05.16.22275120. doi: 10.1101/2022.05.16.22275120
- 508 40. Rinaldi E, Stellmach C, Rajkumar NMR, Carocchia N, Dellacasa C, Giannella M, Guedes M,  
509 Mirandola M, Scipione G, Tacconelli E, Thun S. Harmonization and standardization of data for a  
510 pan-European cohort on SARS- CoV-2 pandemic. *Npj Digit Med* Nature Publishing Group; 2022  
511 Jun 14;5(1):1–13. doi: 10.1038/s41746-022-00620-x
- 512 41. Kapsner LA, Kampf MO, Seuchter SA, Gruendner J, Gulden C, Mate S, Mang JM, Schüttler C,  
513 Deppenwiese N, Krause L, Zöller D, Balig J, Fuchs T, Fischer P, Haverkamp C, Holderried M, Mayer  
514 G, Stenzhorn H, Stolnicu A, Storck M, Storf H, Zohner J, Kohlbacher O, Strzelczyk A, Schüttler J,  
515 Acker T, Boeker M, Kaisers UX, Kestler HA, Prokosch H-U. Reduced Rate of Inpatient Hospital  
516 Admissions in 18 German University Hospitals During the COVID-19 Lockdown. *Front Public*  
517 *Health* 2021;8. Available from:  
518 <https://www.frontiersin.org/articles/10.3389/fpubh.2020.594117> [accessed Oct 27, 2022]
- 519 42. Horn A, Krist L, Lieb W, Montellano FA, Kohls M, Haas K, Gelbrich G, Bolay-Gehrig SJ, Morbach C,  
520 Reese JP, Störk S, Fricke J, Zoller T, Schmidt S, Triller P, Kretzler L, Rönnefarth M, Von Kalle C,  
521 Willich SN, Kurth F, Steinbeis F, Witzenrath M, Bahmer T, Hermes A, Krawczak M, Reinke L,  
522 Maetzler C, Franzenburg J, Enderle J, Flinspach A, Vehreschild J, Schons M, Illig T, Anton G,  
523 Ungethüm K, Finkenber BC, Gehrig MT, Savaskan N, Heuschmann PU, Keil T, Schreiber S. Long-  
524 term health sequelae and quality of life at least 6 months after infection with SARS-CoV-2: design  
525 and rationale of the COVIDOM-study as part of the NAPKON population-based cohort platform  
526 (POP). *Infection* 2021 Dec 1;49(6):1277–1287. doi: 10.1007/s15010-021-01707-5
- 527 43. Prokosch H-U, Bahls T, Bialke M, Eils J, rgen, Fegeler C, Gruendner J, Haarbrandt B, Hampf C,  
528 Hoffmann W, Hund H, Kampf M, Kapsner LA, Kasprzak P, Kohlbacher O, Krefting D, Mang JM,  
529 Marschollek M, Mate S, M&#252, Ller A, Prasser F, Sass J, Semler S, Stenzhorn H, Thun S, Zenker  
530 S, Eils R. The COVID-19 Data Exchange Platform of the German University Medicine. *Chall Trust*  
531 *AI Added-Value Health IOS Press*; 2022;674–678. doi: 10.3233/SHTI220554
- 532 44. Perlin JB. Health Information Technology Interoperability and Use for Better Care and Evidence.  
533 *JAMA* 2016 Oct 25;316(16):1667–1668. doi: 10.1001/jama.2016.12337
- 534 45. Cutillo CM, Sharma KR, Foschini L, Kundu S, Mackintosh M, Mandl KD. Machine intelligence in  
535 healthcare—perspectives on trustworthiness, explainability, usability, and transparency. *Npj*  
536 *Digit Med* Nature Publishing Group; 2020 Mar 26;3(1):1–5. doi: 10.1038/s41746-020-0254-2

537

538

## 539 Supplementary Appendix

540 The following tables show the data items that are included in the immunization extension module  
541 (Table S 1), the pediatrics extension module (Table S 2), and the cardiology extension module (Table S  
542 3). Note that these tables list only the data items of the extension modules that are not included in the  
543 GECCO core dataset and that the complete dataset definition for each specialty consists of the GECCO  
544 core dataset together with the data items of the extension module.

### 545 GECCO Immunization extension module

| Category                                              | Data Element                            | FHIR Resource                                        | Item                                                     |
|-------------------------------------------------------|-----------------------------------------|------------------------------------------------------|----------------------------------------------------------|
| <b>Anamnesis</b>                                      | Chemotherapy                            | Procedure                                            | Chemotherapy                                             |
|                                                       | Immunosuppressive therapy               | Procedure                                            | Immunosuppressive therapy                                |
|                                                       | Regular Alcohol Intake                  | Observation                                          | Frequency                                                |
| Quantity                                              |                                         |                                                      |                                                          |
| <b>COVID-19 infection &amp; treatment</b>             | Disease course                          | Encounter, Procedure                                 | No symptoms                                              |
|                                                       |                                         |                                                      | Treated at home                                          |
|                                                       |                                         |                                                      | Treated at hospital with oxygen therapy                  |
|                                                       |                                         |                                                      | Treated at hospital without oxygen therapy               |
|                                                       | Treated at intensive care unit          |                                                      |                                                          |
| SARS-CoV-2 infection                                  | Condition                               | SARS-CoV-2 infection                                 |                                                          |
| SARS-CoV-2 variant                                    | Observation                             | SARS-CoV-2 variant                                   |                                                          |
| <b>Immunization</b>                                   | Contraindications to immunization       | Immunization                                         | Allergy                                                  |
|                                                       |                                         |                                                      | Pregnancy                                                |
|                                                       | Immunizations performed                 | Immunization                                         | Date                                                     |
|                                                       |                                         |                                                      | Lot number                                               |
|                                                       |                                         |                                                      | Type                                                     |
|                                                       | Reason for immunization                 | Immunization                                         | Everybody gets vaccinated                                |
|                                                       |                                         |                                                      | Protection of private environment from infection/disease |
| Protection of themself from infection/disease         |                                         |                                                      |                                                          |
| Protection of work environment from infection/disease |                                         |                                                      |                                                          |
| Worrying about disadvantages                          |                                         |                                                      |                                                          |
| Willingness to receive additional immunization doses  | Observation                             | Willingness to receive additional immunization doses |                                                          |
| <b>Immunization reactions</b>                         | Analgesic or antipyretic drug intake    | MedicationStatement                                  | Analgesic or antipyretic drug intake                     |
|                                                       | Body temperature                        | Observation                                          | Body temperature after vaccination                       |
|                                                       |                                         |                                                      | Allergic reaction after immunization                     |
|                                                       |                                         |                                                      | Injection site erythema                                  |
|                                                       |                                         |                                                      | Injection site pain at rest                              |
|                                                       |                                         |                                                      | Injection site pain during pressure/movement             |
|                                                       | Injection site swelling                 |                                                      |                                                          |
|                                                       | Medical treatment for adverse reactions | Encounter                                            | Ambulatory                                               |
| Inpatient                                             |                                         |                                                      |                                                          |
| No treatment                                          |                                         |                                                      |                                                          |
| Symptoms after Vaccination                            | Condition                               | Chill                                                |                                                          |

|  |  |  |                      |
|--|--|--|----------------------|
|  |  |  | Diarrhea             |
|  |  |  | Difficulty breathing |
|  |  |  | Dyspnea              |
|  |  |  | Exhaustion           |
|  |  |  | Fatigue              |
|  |  |  | Feeling feverish     |
|  |  |  | Fever                |
|  |  |  | Fever with chills    |
|  |  |  | Joint pain           |
|  |  |  | Liquid stool         |
|  |  |  | Loose stool          |
|  |  |  | Muscle pain          |
|  |  |  | Nausea               |
|  |  |  | Soft stool           |
|  |  |  | Vomiting symptom     |

546 *Table S 1 Data items in the immunization extension module extending the GECCO core dataset. Shown*  
 547 *are the data elements and the FHIR resource they have been mapped to, as well as the items for each*  
 548 *data element (i.e., different response options).*

549

550 **GECCO Pediatrics extension module**

| Category             | Data Element              | FHIR Resource | Item                              |
|----------------------|---------------------------|---------------|-----------------------------------|
| <b>Complications</b> | Complications to COVID-19 | Condition     | Anemia                            |
|                      |                           |               | Arterial aneurysm                 |
|                      |                           |               | Ascites                           |
|                      |                           |               | Aspergillosis                     |
|                      |                           |               | Bacterial arthritis               |
|                      |                           |               | Bacterial endocarditis            |
|                      |                           |               | Bacterial meningitis              |
|                      |                           |               | Bacterial osteomyelitis           |
|                      |                           |               | Bronchiolitis                     |
|                      |                           |               | Bronchitis                        |
|                      |                           |               | Chlamydial infection              |
|                      |                           |               | Chronic fatigue syndrome          |
|                      |                           |               | Colitis                           |
|                      |                           |               | Disease caused by Adenovirus      |
|                      |                           |               | Disease caused by Coronaviridae   |
|                      |                           |               | Disease caused by Human bocavirus |
|                      |                           |               | Disease caused by Rhinovirus      |
|                      |                           |               | Disorder of liver                 |
|                      |                           |               | Haemophilus influenzae infection  |
|                      |                           |               | Human metapneumovirus infection   |
| Ileitis              |                           |               |                                   |

|                          |                         |                          |                                                             |
|--------------------------|-------------------------|--------------------------|-------------------------------------------------------------|
|                          |                         |                          | Infection caused by Candida albicans                        |
|                          |                         |                          | Infection caused by Escherichia coli                        |
|                          |                         |                          | Infection caused by Klebsiella                              |
|                          |                         |                          | Infection caused by Pseudomonas aeruginosa                  |
|                          |                         |                          | Infection caused by Staphylococcus aureus                   |
|                          |                         |                          | Infection caused by Streptococcus viridans group            |
|                          |                         |                          | Infection caused by enterococcus                            |
|                          |                         |                          | Infection of bloodstream                                    |
|                          |                         |                          | Influenza                                                   |
|                          |                         |                          | Invasive Group A beta-hemolytic streptococcal disease       |
|                          |                         |                          | Invasive Streptococcus pneumoniae disease                   |
|                          |                         |                          | Legionella infection                                        |
|                          |                         |                          | Meningococcal infectious disease                            |
|                          |                         |                          | Mycoplasma infection                                        |
|                          |                         |                          | Organic mental disorder                                     |
|                          |                         |                          | Parainfluenza                                               |
|                          |                         |                          | Peritonitis                                                 |
|                          |                         |                          | Pertussis                                                   |
|                          |                         |                          | Post-acute COVID-19                                         |
|                          |                         |                          | Procedure needed Where Associated procedure = Resuscitation |
|                          |                         |                          | Pyelonephritis                                              |
|                          |                         |                          | Respiratory syncytial virus infection                       |
|                          |                         |                          | Seizure disorder                                            |
|                          |                         |                          | Streptococcus agalactiae infection                          |
|                          |                         |                          | Streptococcus pyogenes infection                            |
|                          |                         |                          | Syncope                                                     |
| <b>Demographics</b>      | Body measures           | Observation              | Birth height                                                |
|                          |                         |                          | Birth height (percentile)                                   |
|                          |                         |                          | Body mass index                                             |
|                          |                         |                          | Body mass index (percentile)                                |
|                          |                         |                          | Head circumference                                          |
|                          |                         |                          | Head circumference (percentile)                             |
| <b>Imaging</b>           | Echocardiography        | Procedure, Imaging Study | Echocardiography                                            |
|                          | PET-CT                  | Procedure, Imaging Study | Positron emission tomography with computed tomography       |
| <b>Immunization</b>      | Immunizations performed | Immunization             | Viral vector vaccine                                        |
|                          |                         |                          | mRNA vaccine                                                |
| <b>Laboratory values</b> | Laboratory values       | Observation              | Alanine Aminotransferase                                    |
|                          |                         |                          | Albumin                                                     |
|                          |                         |                          | Amylase                                                     |
|                          |                         |                          | Calprotectin                                                |
|                          |                         |                          | Cells in CSF                                                |
|                          |                         |                          | Complement C3                                               |
|                          |                         |                          | Complement C4                                               |
|                          |                         |                          | Creatine kinase                                             |
|                          |                         |                          | Creatine kinase.MB                                          |



|                                       |                              |                                            |                                                              |
|---------------------------------------|------------------------------|--------------------------------------------|--------------------------------------------------------------|
|                                       |                              |                                            | Erythrocyte sedimentation rate                               |
|                                       |                              |                                            | Glucose in CSF                                               |
|                                       |                              |                                            | Hematocrit                                                   |
|                                       |                              |                                            | IgG                                                          |
|                                       |                              |                                            | Interleukin 10                                               |
|                                       |                              |                                            | Interleukin 2 Receptor Soluble                               |
|                                       |                              |                                            | Lactate in CSF                                               |
|                                       |                              |                                            | Lipase                                                       |
|                                       |                              |                                            | Natural killer cell function                                 |
|                                       |                              |                                            | Neutrophil cytoplasmic Ab                                    |
|                                       |                              |                                            | Nuclear Ab                                                   |
|                                       |                              |                                            | Protein in CSF                                               |
|                                       |                              |                                            | Prothrombin time (PT)                                        |
|                                       |                              |                                            | SARS-CoV-2 RT in stool                                       |
|                                       |                              |                                            | SARS-CoV-2 RT in urine                                       |
|                                       |                              |                                            | Sodium                                                       |
|                                       |                              |                                            | Triglyceride                                                 |
|                                       |                              |                                            | Urea                                                         |
| <b>Medical history</b>                | Chronic Hematologic Diseases | Condition                                  | Blood coagulation disorder                                   |
|                                       |                              |                                            | Glucose-6-phosphate dehydrogenase deficiency anemia          |
|                                       |                              |                                            | Hemolytic anemia                                             |
|                                       |                              |                                            | Iron deficiency anemia                                       |
|                                       |                              |                                            | Myelodysplastic syndrome                                     |
|                                       |                              |                                            | Neutropenic disorder where Clinical course = Chronic         |
|                                       |                              |                                            | Sickle cell-hemoglobin SS disease                            |
|                                       |                              |                                            | Thalassemia                                                  |
|                                       | Chronic Kidney Diseases      | Condition                                  | Disorder of the urinary system where Occurrence = Congenital |
|                                       |                              |                                            | Kidney disease where Occurrence = Congenital                 |
|                                       | Congenital Disease           | Condition                                  | Congenital Disease                                           |
|                                       | Gastrointestinal Diseases    | Condition                                  | Allergy to cow's milk protein                                |
|                                       |                              |                                            | Celiac disease                                               |
| Chronic constipation                  |                              |                                            |                                                              |
| Disorder of bile duct                 |                              |                                            |                                                              |
| Disorder of gastrointestinal tract    |                              |                                            |                                                              |
| Medical History Stem Cells Transplant | Condition                    | History of bone marrow transplant          |                                                              |
|                                       |                              | History of peripheral stem cell transplant |                                                              |
| <b>Medication</b>                     | Medication                   | MedicationStatement                        | Blood product                                                |
|                                       |                              |                                            | Bronchodilator                                               |
|                                       |                              |                                            | Inotropic agent                                              |
|                                       |                              |                                            | Medicinal product acting as antibacterial agent              |
|                                       |                              |                                            | Medicinal product acting as hemostatic                       |
|                                       |                              |                                            | Product containing anakinra                                  |
|                                       |                              |                                            | Product containing aspirin                                   |
|                                       |                              |                                            | Product containing human immunoglobulin                      |
| Product containing nitric oxide       |                              |                                            |                                                              |



|                 |                   |                           |                                                       |
|-----------------|-------------------|---------------------------|-------------------------------------------------------|
|                 |                   |                           | Product containing tocilizumab                        |
|                 |                   |                           | Vasopressor                                           |
|                 |                   | MedicationStatement, List | Alkylating agent                                      |
|                 |                   |                           | Anti-CD20 antibody                                    |
|                 |                   |                           | Anti-CD3 antibody                                     |
|                 |                   |                           | Anti-CD3/CD19 antibody                                |
|                 |                   |                           | Anti-CD52 antibody                                    |
|                 |                   |                           | Antimetabolite                                        |
|                 |                   |                           | B cell activating factor inhibitor                    |
|                 |                   |                           | Calcineurin inhibitor                                 |
|                 |                   |                           | Cytotoxic T-lymphocyte-associated protein 4 inhibitor |
|                 |                   |                           | Equine antithymocyte immunoglobulin                   |
|                 |                   |                           | Immunoglobulin E                                      |
|                 |                   |                           | Integrin inhibitor                                    |
|                 |                   |                           | Interferon                                            |
|                 |                   |                           | Interleukin 1 receptor antagonist                     |
|                 |                   |                           | Interleukin 17 receptor antagonist                    |
|                 |                   |                           | Interleukin 2 receptor antagonist                     |
|                 |                   |                           | Interleukin 6 receptor antagonist                     |
|                 |                   |                           | Janus kinase inhibitor                                |
|                 |                   |                           | Mammalian target of rapamycin-Kinase inhibitor        |
|                 |                   |                           | Protein-tyrosine kinase inhibitor                     |
|                 |                   |                           | Sphingosine analogue                                  |
|                 |                   |                           | Steroid                                               |
|                 |                   |                           | Tumor necrosis factor alpha inhibitor                 |
|                 |                   |                           | interleukin 23 receptor antagonist                    |
| <b>Symptoms</b> | COVID-19 Symptoms | Condition                 | Delirium                                              |
|                 |                   |                           | Eruption of skin                                      |
|                 |                   |                           | Large liver                                           |
|                 |                   |                           | Myoclonus                                             |
|                 |                   |                           | Pain in throat                                        |
|                 |                   |                           | Palmar erythema                                       |
|                 |                   |                           | Raspberry tongue                                      |
|                 |                   |                           | Splenomegaly                                          |
|                 |                   |                           | Swallowing painful                                    |
| <b>Therapy</b>  | Hospitalization   | Observation               | Intensive care treatment duration                     |
|                 |                   |                           | Total length of stay                                  |
|                 | Thoracic Drainage | Procedure                 | Thoracic Drainage                                     |

551 *Table S 2 Data items in the pediatrics extension module extending the GECCO core dataset. Shown are*  
552 *the data elements and the FHIR resource they have been mapped to, as well as the items for each data*  
553 *element (i.e., different response options).*

554

555 GECCO Cardiology extension module

| Category                              | Data Element                          | FHIR Resource | Item                                               |
|---------------------------------------|---------------------------------------|---------------|----------------------------------------------------|
| <b>Anamnesis</b>                      | Chronic cardiologic diseases          | Condition     | Atrial fibrillation                                |
|                                       |                                       |               | Atrial flutter                                     |
|                                       |                                       |               | Cardiomyopathy                                     |
|                                       |                                       |               | Congenital heart disease                           |
|                                       |                                       |               | Heart failure                                      |
|                                       |                                       |               | History of coronary artery bypass grafting         |
| <b>COVID-19-related complications</b> | Cardiologic complications of COVID-19 | Condition     | Bacterial respiratory infection                    |
|                                       |                                       |               | Cardiogenic shock                                  |
|                                       |                                       |               | Complete atrioventricular block                    |
|                                       |                                       |               | Myocarditis                                        |
|                                       |                                       |               | Pericardial effusion                               |
|                                       |                                       |               | Ventricular fibrillation                           |
|                                       |                                       |               | Viral disease                                      |
| <b>Echocardiography</b>               | Echocardiography findings             | Observation   | Abscess of heart                                   |
|                                       |                                       |               | Aortic valve regurgitation                         |
|                                       |                                       |               | Aortic valve stenosis                              |
|                                       |                                       |               | Heart valve disorder                               |
|                                       |                                       |               | Left Ventricular Ejection Fraction                 |
|                                       |                                       |               | Left ventricular hypertrophy                       |
|                                       |                                       |               | Left ventricular wall motion abnormality           |
|                                       |                                       |               | Mitral valve regurgitation                         |
|                                       |                                       |               | Mitral valve stenosis                              |
|                                       |                                       |               | Paradoxical cardiac wall motion                    |
|                                       |                                       |               | Pericardial effusion                               |
|                                       |                                       |               | Pulmonic valve regurgitation                       |
|                                       |                                       |               | Pulmonic valve stenosis                            |
|                                       |                                       |               | Right ventricular hypertrophy                      |
|                                       |                                       |               | Thrombosis                                         |
|                                       |                                       |               | Tricuspid annular plane systolic excursion (TAPSE) |
|                                       |                                       |               | Tricuspid valve regurgitation                      |
|                                       |                                       |               | Tricuspid valve stenosis                           |
|                                       | Vegetation of heart                   |               |                                                    |
|                                       | Ventricular hypertrophy               |               |                                                    |
|                                       | Echocardiography procedure            | Procedure     | Date                                               |
|                                       |                                       |               | Echocardiography                                   |
|                                       |                                       |               | Type of echocardiography                           |
| <b>Electrocardiography</b>            | Electrocardiography findings          | Observation   | Atrial ectopics                                    |
|                                       |                                       |               | Atrioventricular Block                             |
|                                       |                                       |               | Bundle Branch Block                                |
|                                       |                                       |               | Inverted T wave                                    |
|                                       |                                       |               | Low QRS voltages                                   |
|                                       |                                       |               | Premature ventricular contractions                 |
|                                       |                                       |               | QRS Axis                                           |

|                          |                                 |                     |                                 |
|--------------------------|---------------------------------|---------------------|---------------------------------|
|                          |                                 |                     | QRS Interval                    |
|                          |                                 |                     | QT Interval                     |
|                          |                                 |                     | ST Interval                     |
|                          |                                 |                     | Sinus rhythm                    |
|                          | Electrocardiography procedure   | Procedure           | 12 lead electrocardiogram       |
|                          |                                 |                     | Date                            |
| <b>Laboratory Values</b> | Laboratory values               | Observation         | Troponin I                      |
|                          |                                 |                     | Troponin T                      |
| <b>Medication</b>        | Angiotensin receptor antagonist | MedicationStatement | Angiotensin Receptor Antagonist |

556 *Table S 3 Data items in the cardiology extension module extending the GECCO core dataset. Shown are*  
 557 *the data elements and the FHIR resource they have been mapped to, as well as the items for each data*  
 558 *element (i.e., different response options).*

559

560
